# Supplementary material for: Effects of particle stiffness on the extensional rheology of model rod-like nanoparticle suspensions
Source: Royal Society of Chemistry journal article supplement (doi:10.1039/c8sm01925h), 2018-11-29

# Supplementary Information on: Effects of particle stiffness on the extensional rheology of model rod-like nanoparticle suspensions

## Intrinsic moduli of fd and fdY21M at all measured concentrations:

- fd virus:

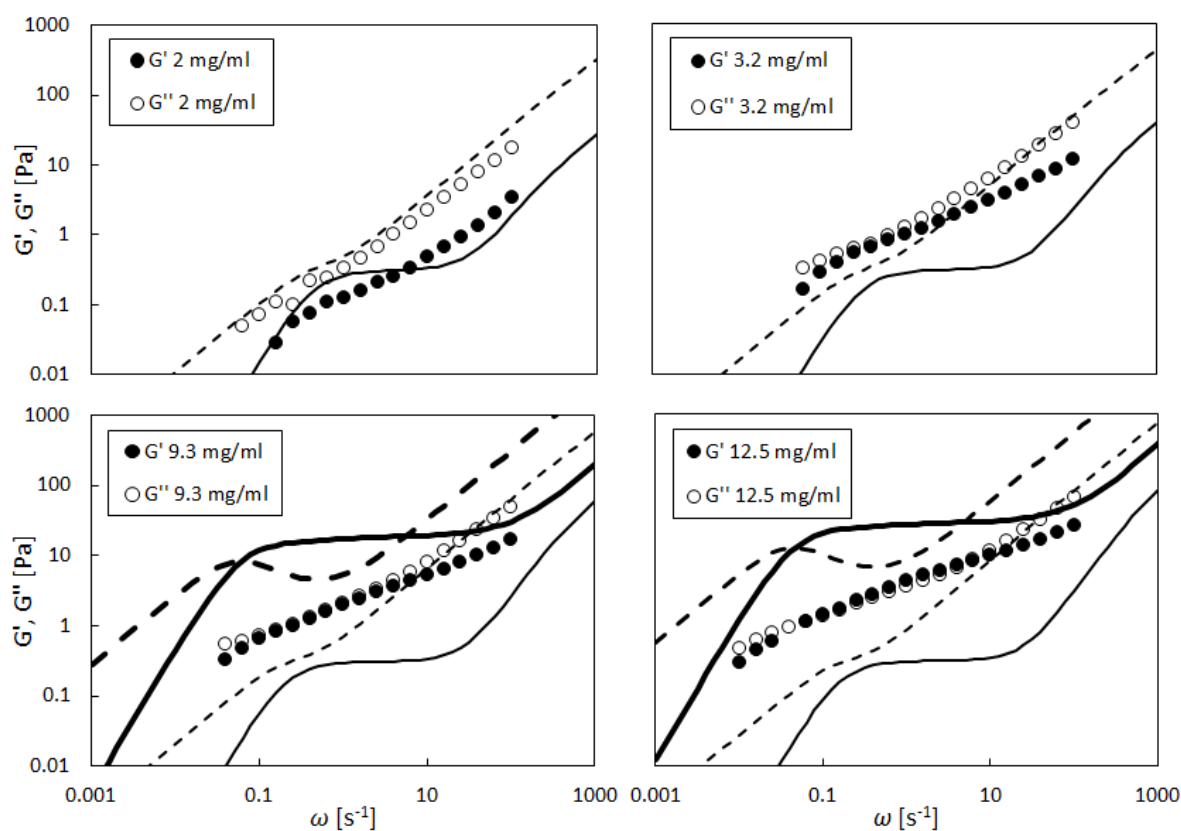

• **fdY21M virus:**

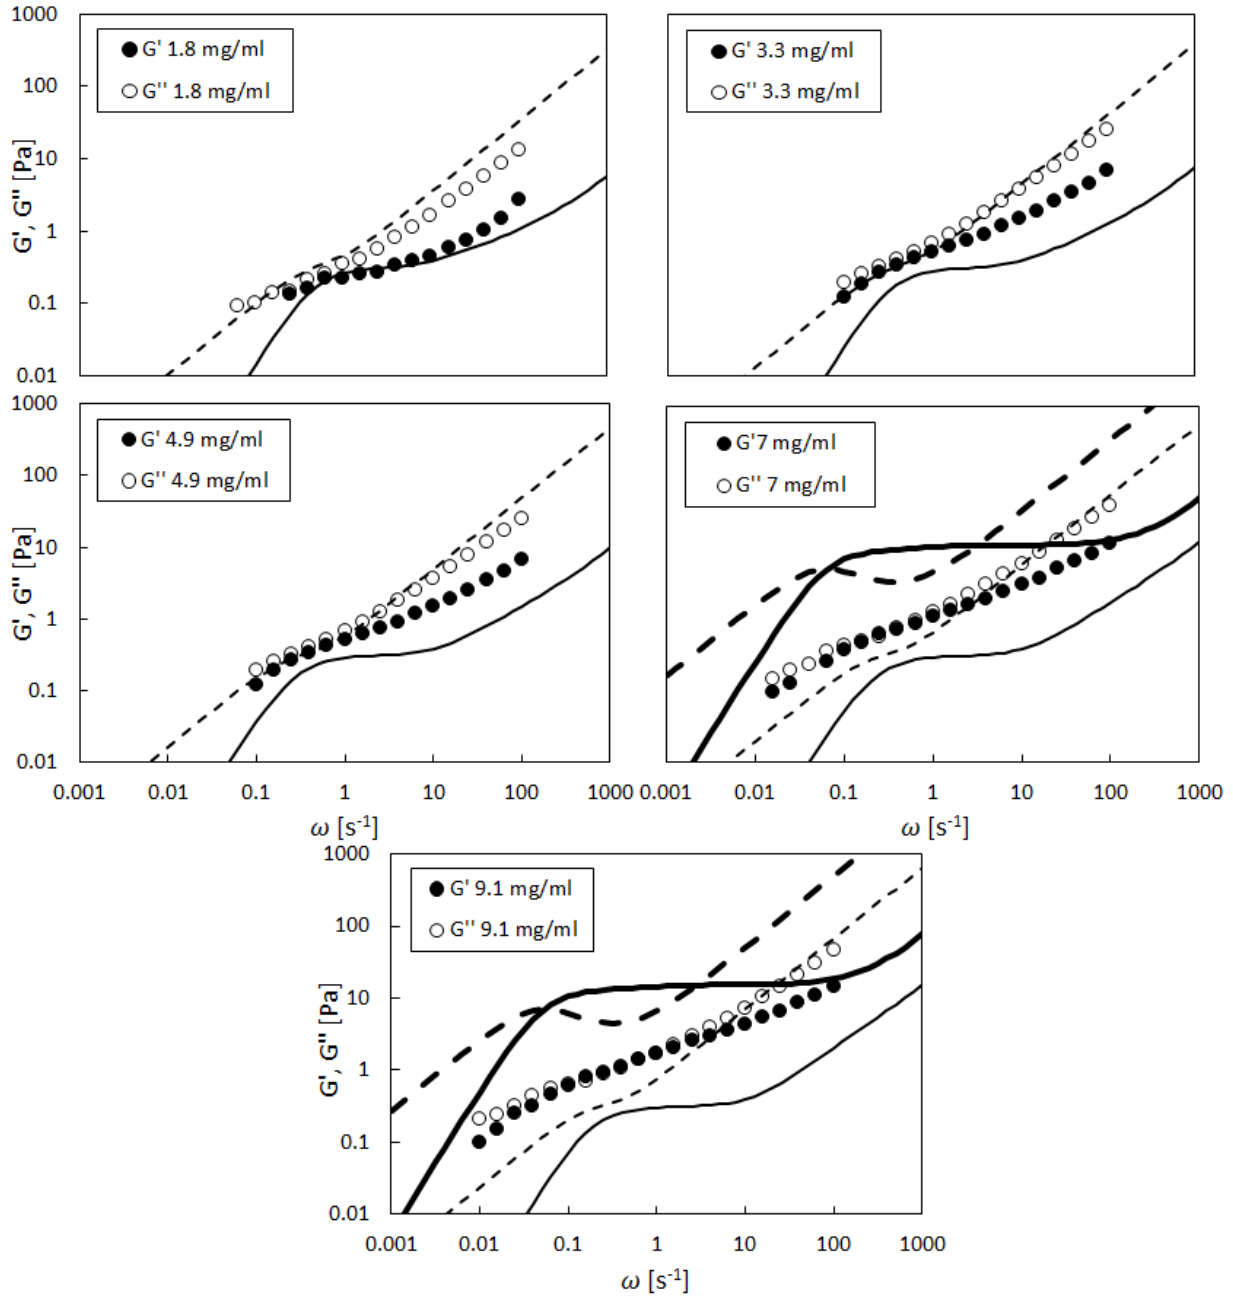

Supplement: c8sm01925h1.pdf [file c8sm01925h1.pdf]
